# Supplementary material
Source: Springer Nature journal article supplement (https://www.springermedizin.de/resource/supplementary/11689_2013_42_MOESM1_ESM.pdf/9673104)
Supplement: MOESM1 [file 9673104]

Comparative DNA methylation among females with neurodevelopmental disorders and seizures identifies *TAC1* as a MeCP2 target gene.

Kimberly A. Aldinger<sup>1</sup>, Jasmine T. Plummer<sup>1</sup>, Pat Levitt<sup>1,2</sup>

<sup>1</sup> Zilkha Neurogenetic Institute, Keck School of Medicine of USC, Los Angeles, CA 90089;

<sup>2</sup> Department of Cell & Neurobiology, Keck School of Medicine of USC, Los Angeles, CA 90089

Supplementary Materials:

Figures S1–7

Tables S1–5

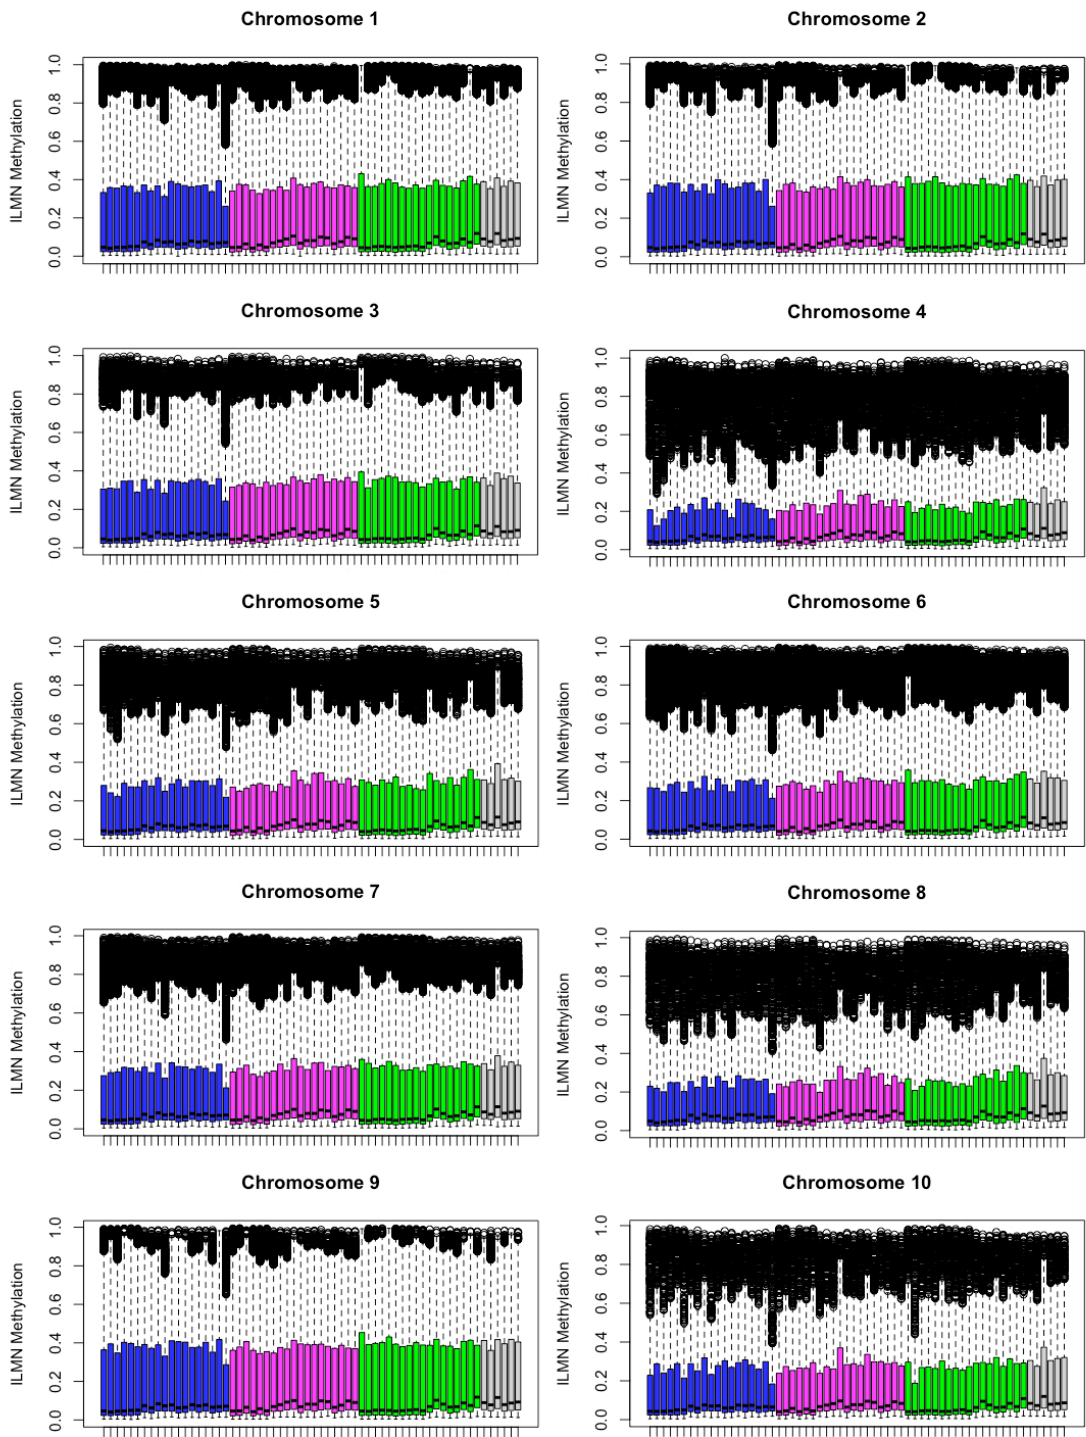

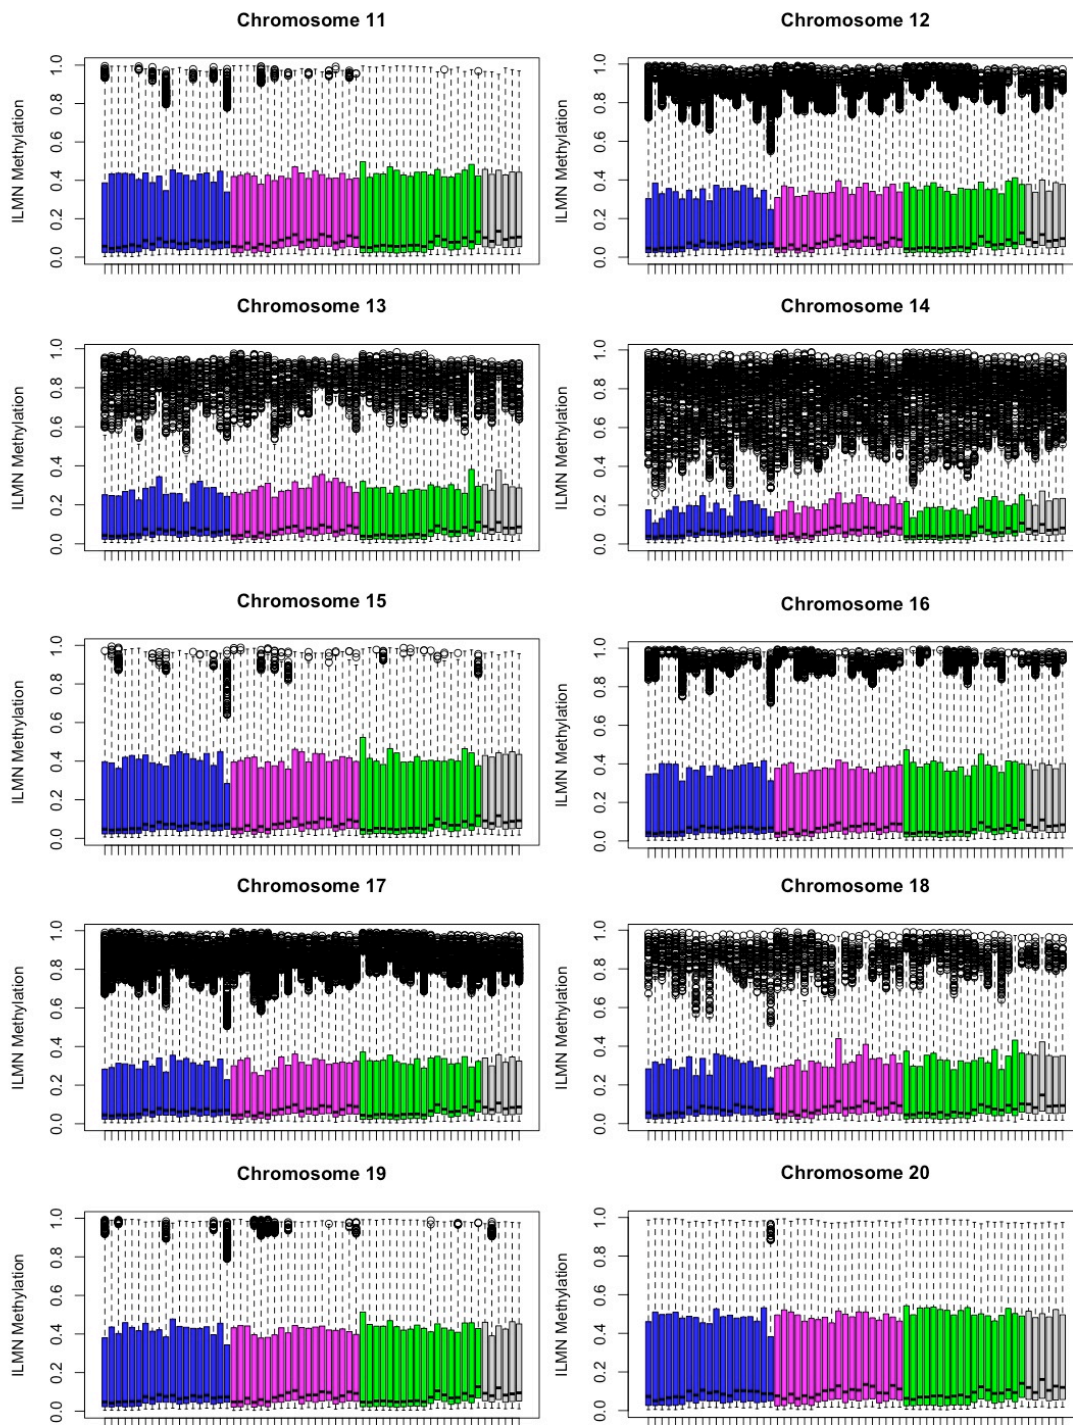

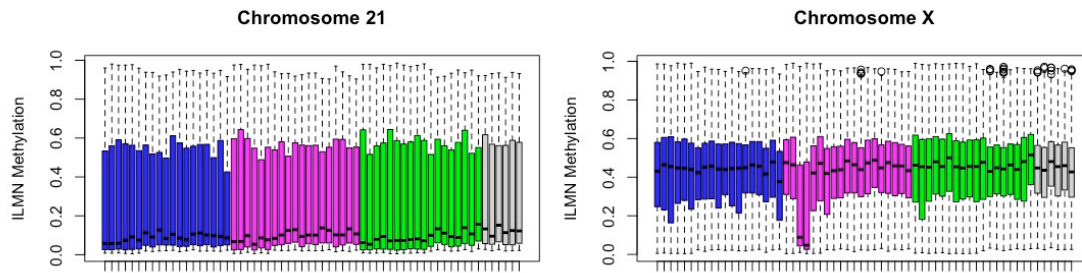

**Figure S1. DNA methylation per chromosome.** Boxplots of DNA methylation for each individual are presented (blue = CTL; pink = AUT, green = RTT, grey = SEZ). Two AUT samples display skewed DNA methylation for chromosome X. SRY+ genotyping confirmed the sex discrepancy in these samples (data not shown). No other chromosome abnormalities were apparent. Copy number variant (CNV) analysis was previously reported for 11 samples (1, 2). Reported CNVs are listed in **Supplemental Table 4**.

### A RTT

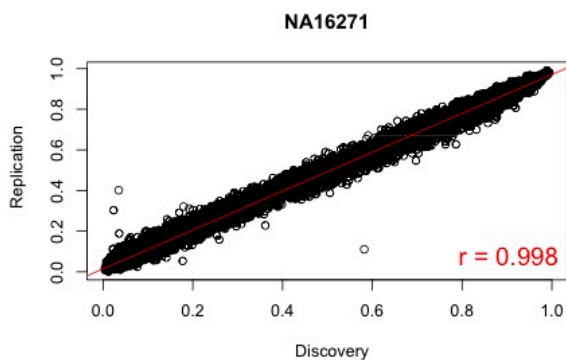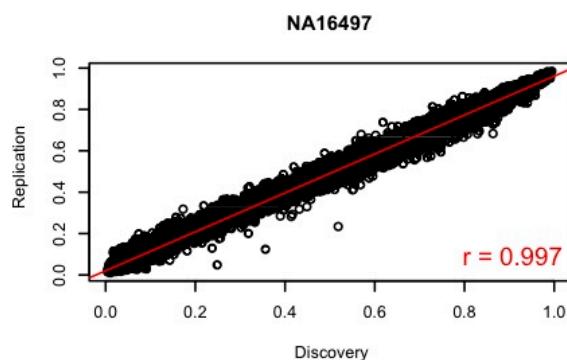

### B AUT

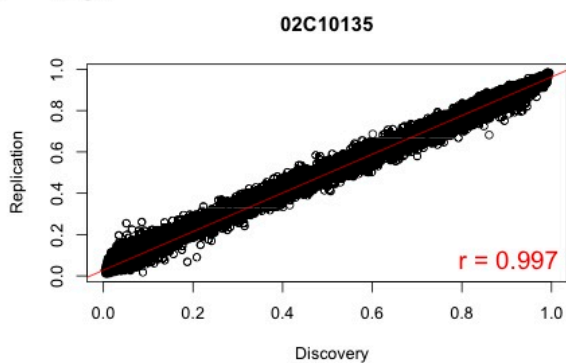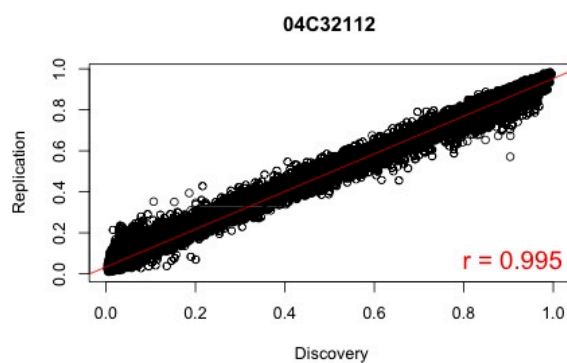

### C CTL

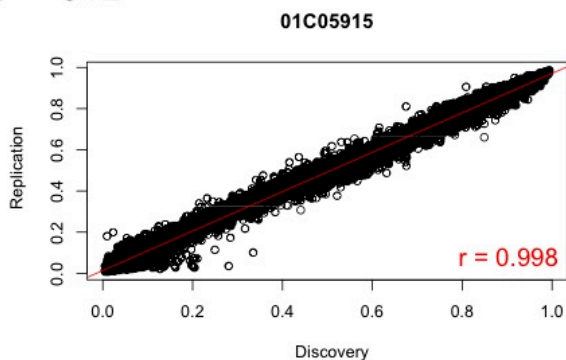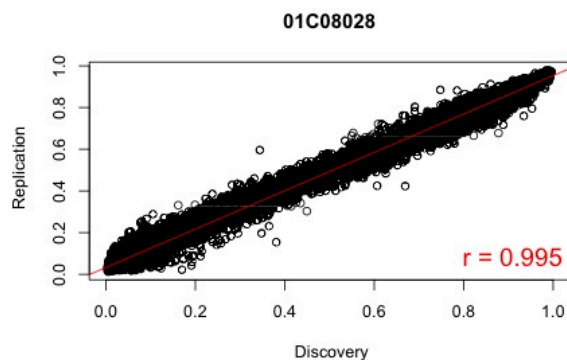

**Figure S2. High correlation between technical replicate pairs.** Six samples (2 per etiological group) assayed using the Illumina HumanMethylation27 assay in discovery were assayed again in replication. Nearly perfect agreement was observed between all technical replicate pairs (Pearson's  $r > 0.99$ ). One sample (02C10135) was not included in further analyses.

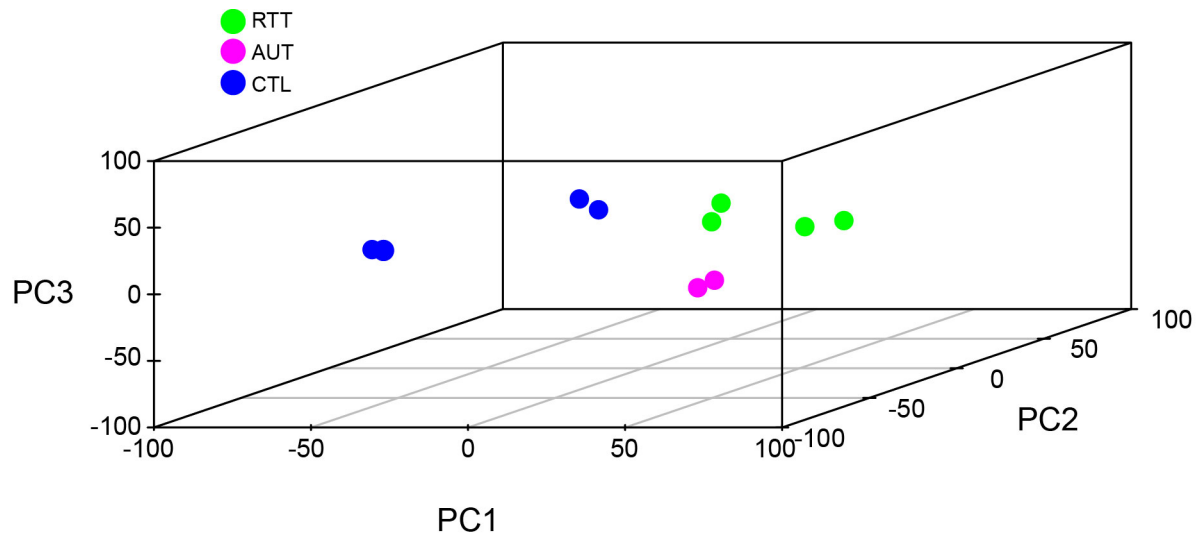

**Figure S3. PCA of DNA methylation data from 5 technical replicate pairs.** PCA of the 40 probe methylation profile for the 5 replication samples shows tight clustering between replicate pairs. Three principle components (PC1-3), representing 44.0, 30.8, and 15.1% of the variance, respectively, are shown.

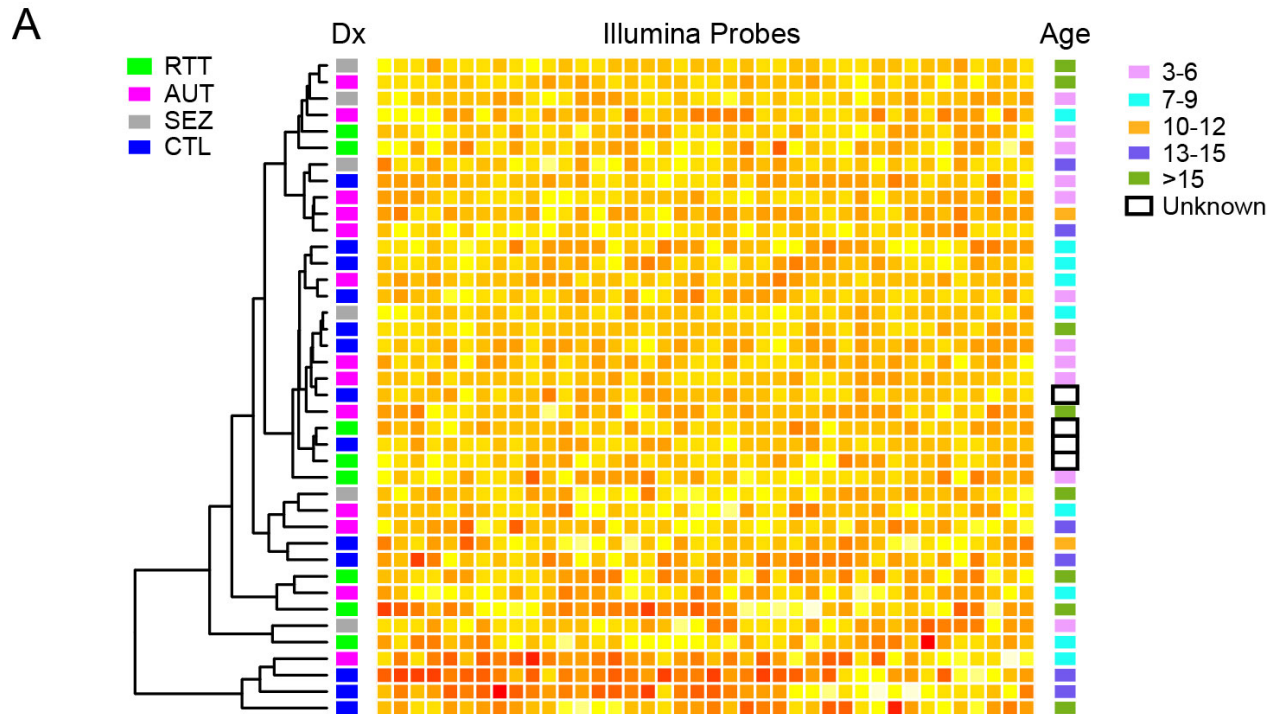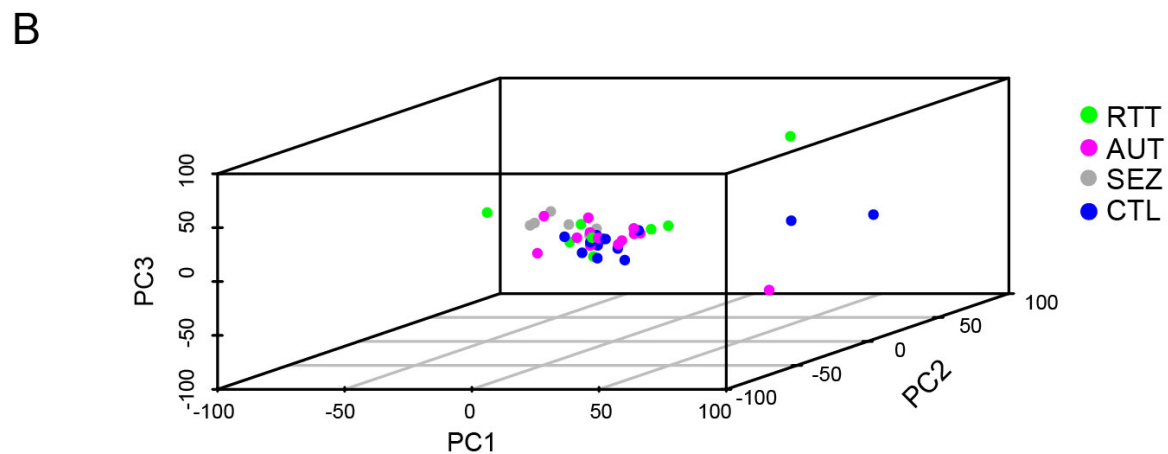

**Figure S4. Hierarchical clustering and PCA of DNA methylation data from the replication cohort.** The selected 40 probes comparing LCL samples from females diagnosed with neurodevelopmental disorders (RTT, AUT, and SEZ) to CTL females were used for hierarchical clustering and PCA. (A) Hierarchical clustering of the 40 females in the replication cohort. There was no strong clustering of DNA methylation patterns by etiology (or by age). (B) PCA of the 40 probe methylation profile for the 40 replication samples. Three principle components (PC1-3), representing 18.3, 11.6, and 8.0% of the variance, respectively, are shown.

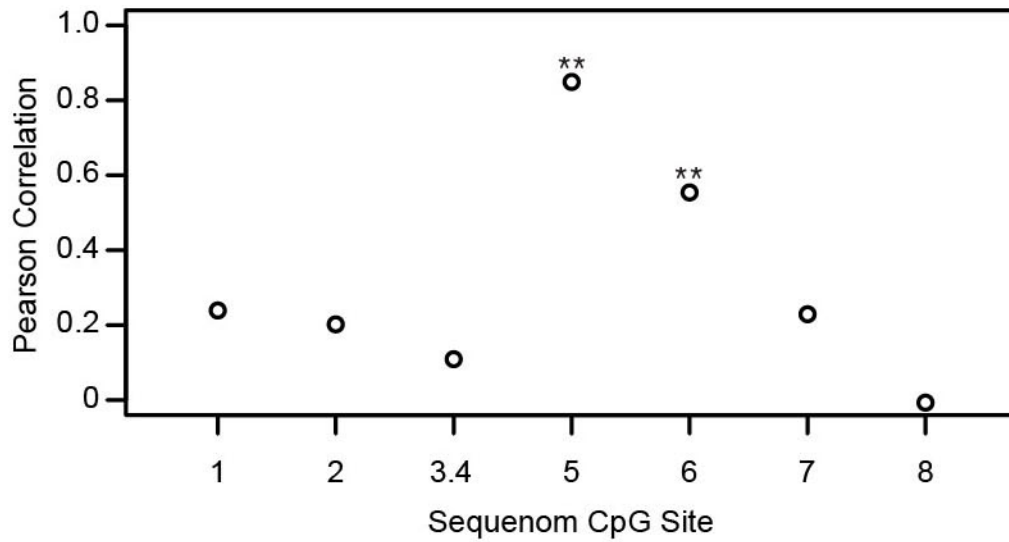

**Figure S5. Sequenom DNA methylation validation at the *TAC1* promoter.** The *TAC1* Sequenom target region includes 8 CpG sites, 2 of which are overlapping (3 and 4). Mean methylation levels at CpG sites 5 and 6 are significantly correlated with Illumina probe mean methylation levels ( $P < 0.00001$ ).



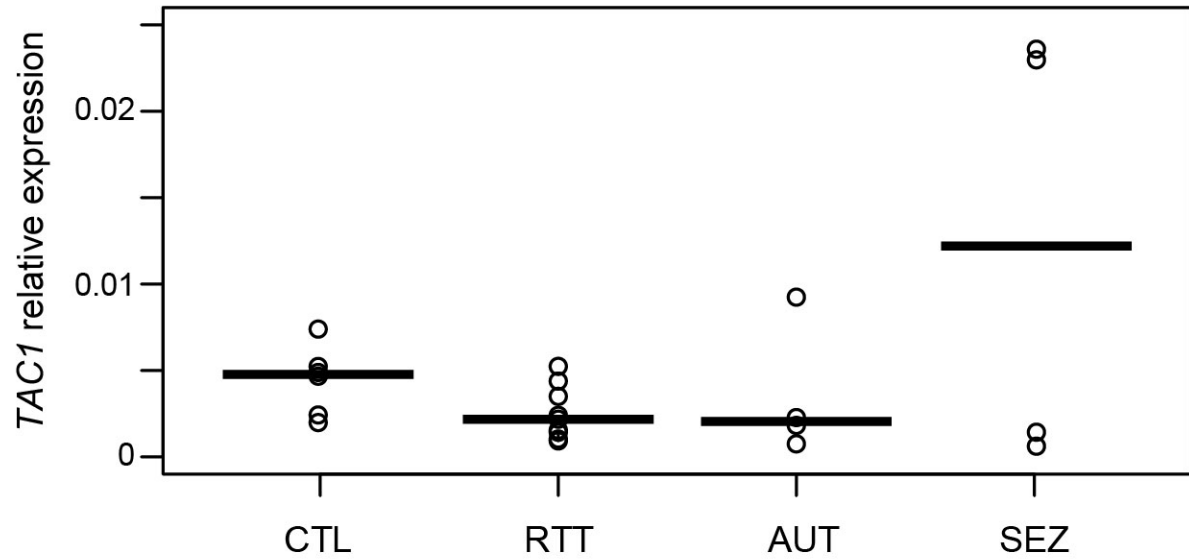

**Figure S6. *TAC1* expression in LCLs.** *TAC1* mRNA assayed by qRT-PCR. No significant difference in *TAC1* expression was detected between clinical groups. Overall, *TAC1* is weakly expressed in LCLs, consistent with previously reported expression in lymphocytes. Data are presented as mean  $\pm$  s.e.m.

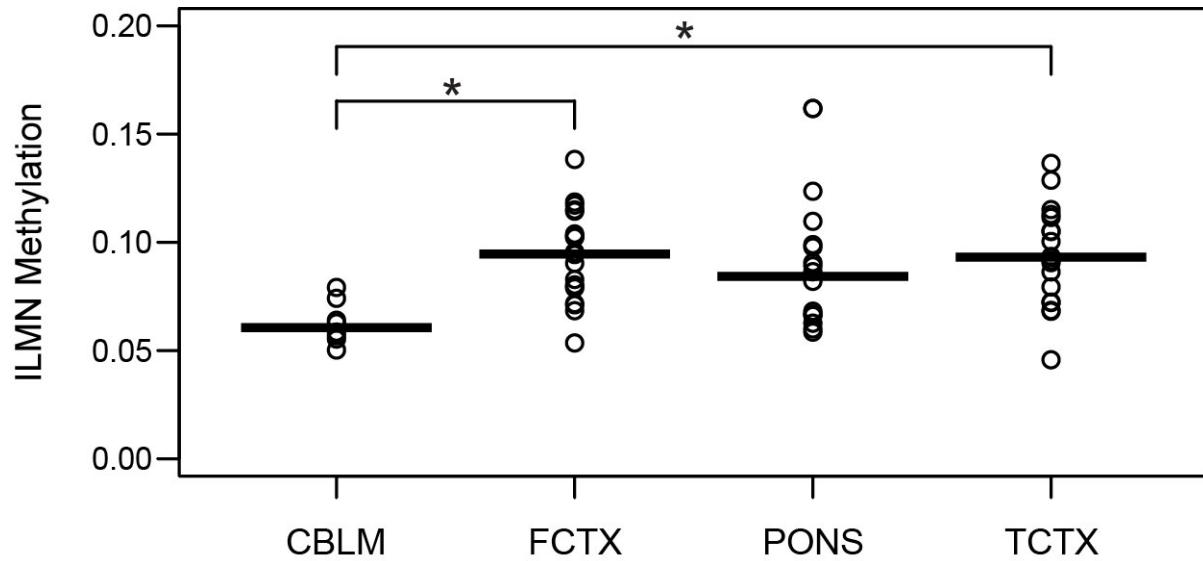

**Figure S7. *TAC1* promoter CpG DNA methylation in female postmortem brain.** *TAC1* DNA methylation (cg14221171) assayed in cerebellum (CBLM), frontal cortex (FCTX), pons and temporal cortex (TCTX) from control female postmortem brain using the Illumina HumanMethyl27 BeadChip. Significant differential DNA methylation of *TAC1* occurs among distinct brain regions (ANOVA  $F(3,63)=4.39$ ,  $P=0.007$ ). *TAC1* was significantly hypermethylated in the CBLM relative to TCTX (Tukey *post hoc*,  $P=0.009$ ) and FCTX ( $P=0.006$ ), though there was no differential DNA methylation between the two cerebral cortex regions included in this study ( $P>0.05$ ). \* $P>0.01$ .

**Table S1. LCL sample characteristics.**

| SAMPLE   | SOURCE | DX  | NUCLEOTIDE | PROTEIN | SEX | AGE | RACE | ILMN | SEQ | LCL |
|----------|--------|-----|------------|---------|-----|-----|------|------|-----|-----|
| 00C04563 | RUCDR  | AUT |            |         | F   | 23  | Euro | 2    | +   |     |
| 01C06480 | RUCDR  | AUT |            |         | F   | 7   | Euro | 2    | +   |     |
| 01C06497 | RUCDR  | AUT |            |         | F   | 13  | Euro | 2    | +   |     |
| 01C07488 | RUCDR  | AUT |            |         | F   | 9   | Euro | 2    | +   |     |
| 02C10135 | RUCDR  | AUT |            |         |     |     |      |      |     |     |
| 02C10223 | RUCDR  | AUT |            |         |     |     |      |      |     |     |
| 03C15793 | RUCDR  | AUT |            |         | F   | 12  | Euro | 2    | +   |     |
| 03C15943 | RUCDR  | AUT |            |         | F   | 3   | Euro | 2    | +   |     |
| 03C16444 | RUCDR  | AUT |            |         | F   | 5   | Euro | 2    | +   | +   |
| 03C16562 | RUCDR  | AUT |            |         | F   | 7   | Euro | 2    | +   | +   |
| 03C17196 | RUCDR  | AUT |            |         | F   | 15  | Euro | 2    | +   |     |
| 04C24298 | RUCDR  | AUT |            |         | F   | 29  | Euro | 2    | +   |     |
| 04C32112 | RUCDR  | AUT |            |         | F   | 3   | Euro | 1,2  | +   | +   |
| 04C35560 | RUCDR  | AUT |            |         | F   | 6   | Euro | 1    | +   | +   |
| 04C36042 | RUCDR  | AUT |            |         | F   | 6   | Euro | 2    | +   |     |
| 04C36352 | RUCDR  | AUT |            |         | F   | 15  | Euro | 1    | +   |     |
| 05C40546 | RUCDR  | AUT |            |         | F   | 9   | Euro | 1    |     |     |
| 05C42143 | RUCDR  | AUT |            |         | F   | 14  | Euro | 2    | +   |     |
| 05C47170 | RUCDR  | AUT |            |         | F   | 9   | Euro | 2    | +   | +   |
| 01C05476 | RUCDR  | CTL |            |         | F   | 14  | Euro | 1    | +   |     |
| 01C05712 | RUCDR  | CTL |            |         | F   | 14  | Euro | 2    | +   |     |
| 01C05898 | RUCDR  | CTL |            |         | F   | 26  | Euro | 2    | +   |     |
| 01C05915 | RUCDR  | CTL |            |         | F   | 3   | Euro | 1,2  | +   | +   |
| 01C06052 | RUCDR  | CTL |            |         | F   | 11  | Euro | 2    | +   |     |
| 01C06061 | RUCDR  | CTL |            |         | F   | 16  | Euro | 2    | +   |     |
| 01C06493 | RUCDR  | CTL |            |         | F   | 7   | Euro | 2    | +   | +   |
| 01C07313 | RUCDR  | CTL |            |         | F   | 6   | Euro | 1    | +   | +   |
| 01C07372 | RUCDR  | CTL |            |         | F   | 9   | Euro | 1    | +   | +   |
| 01C08028 | RUCDR  | CTL |            |         | F   | 13  | Euro | 1,2  | +   | +   |
| 01C08060 | RUCDR  | CTL |            |         | F   | 14  | Euro | 2    | +   | +   |
| 01C08448 | RUCDR  | CTL |            |         | F   | 15  | Euro | 1    | +   |     |
| 04C31982 | RUCDR  | CTL |            |         | F   | 4   | Euro | 2    | +   |     |
| 04C35584 | RUCDR  | CTL |            |         | F   | 6   | Euro | 2    | +   |     |
| 04C36913 | RUCDR  | CTL |            |         | F   | 5   | Euro | 2    | +   | +   |
| 05C40435 | RUCDR  | CTL |            |         | F   |     | Euro | 2    | +   |     |
| 07C64541 | RUCDR  | CTL |            |         | F   | 9   | Euro | 2    | +   |     |
| 07C64722 | RUCDR  | CTL |            |         | F   | 15  | Euro | 2    | +   |     |
| 07C68500 | RUCDR  | CTL |            |         | F   |     | Euro | 2    | +   |     |
| ND02110  | CCR    | EPI |            |         | F   | 9   | Euro | 2    | +   | +   |
| ND04353  | CCR    | EPI |            |         | F   | 3   | Euro | 2    | +   | +   |
| ND06755  | CCR    | EPI |            |         | F   | 30  | Euro | 2    | +   |     |
| ND08877  | CCR    | EPI |            |         | F   | 14  | Euro | 2    | +   | +   |
| ND09027  | CCR    | EPI |            |         | F   | 25  | Euro | 2    | +   |     |
| ND21676  | CCR    | EPI |            |         | F   | 6   | Euro | 2    | +   | +   |
| GM07983  | CCR    | RTT | 705delG    | E235fs  | F   | 25  | Euro | 2    | +   | +   |

|         |     |     |                |        |   |    |      |     |   |   |
|---------|-----|-----|----------------|--------|---|----|------|-----|---|---|
| GM11300 | CCR | RTT | 316C>T         | R106W  | F |    |      | 1   | + |   |
| GM11301 | CCR | RTT | 705delG        | E235fs | F |    |      | 2   | + | + |
| GM11304 | CCR | RTT | 880C>T         | R294X  | F |    |      | 1   | + |   |
| GM11310 | CCR | RTT | 502C>T         | R168X  | F |    |      | 1   | + | + |
| GM11313 | CCR | RTT |                |        | F |    |      | 2   |   |   |
| GM16270 | CCR | RTT | 763C>T         | R255X  | F | 6  | Euro | 1   | + | + |
| GM16271 | CCR | RTT | 473C>T         | T158M  | F | 3  | Euro | 1,2 | + | + |
| GM16368 | CCR | RTT | 473C>T         | T158M  | F | 4  | Euro | 1   | + |   |
| GM16382 | CCR | RTT | 1160_1185del26 | P387fs | F | 6  | Euro | 2   | + |   |
| GM16405 | CCR | RTT | 481G>A         | G161V  | F | 6  | Euro | 2   | + | + |
| GM16480 | CCR | RTT | 916C>T         | R306C  | F | 14 | Euro | 1   | + | + |
| GM16497 | CCR | RTT | 763C>T         | R255X  | F | 13 | Euro | 1,2 | + | + |
| GM16546 | CCR | RTT | 880C>T         | R294X  | F | 15 | Euro | 1   | + |   |
| GM16547 | CCR | RTT | 730C>T         | Q244X  | F | 5  | Euro | 2   | + | + |
| GM16560 | CCR | RTT |                |        | F | 30 | Euro | 2   |   |   |
| GM17540 | CCR | RTT | 401C>G         | S134C  | F | 9  | Euro | 1   | + | + |
| GM17583 | CCR | RTT | 298C>G         | L100V  | F | 7  | Euro | 2   |   |   |

*MECP2* nucleotide and protein mutations are listed where applicable; No mutation is reported in CCR for GM11313 or GM16560; GM17583 is also 46,XXX. Samples included in ILMN discovery (1) or replication (2). Abbreviations: DX, diagnosis; AUT, autism; CCR, Coriell Cell Repositories; CTL, control; Euro, European; RTT, Rett syndrome; RUCDR, Rutgers University Cell and DNA Repository; ILMN, Illumina HumanMethylation27 Assay; SEQ, Sequenom EpiTYPER Assays; LCL, lymphoblastoid cell line.

**Table S2. ANOVA results for 391 probes with  $\Delta\beta \geq 0.15$  in the discovery cohort**

| PROBE      | GENE           | CHR | $\Delta\beta$ |         |         | P      | FDR  |
|------------|----------------|-----|---------------|---------|---------|--------|------|
|            |                |     | RTT-CTL       | RTT-AUT | AUT-CTL |        |      |
| cg17950095 | <i>HOXA11</i>  | 7   | -0.13         | 0.05    | -0.18   | 0.0002 | 0.03 |
| cg00187686 | <i>TCN1</i>    | 11  | 0.20          | -0.02   | 0.23    | 0.0002 | 0.03 |
| cg04527989 | <i>PTCD2</i>   | 5   | 0.00          | 0.19    | -0.18   | 0.0003 | 0.03 |
| cg14221171 | <i>TAC1</i>    | 7   | 0.07          | -0.18   | 0.25    | 0.0004 | 0.03 |
| cg03718539 | <i>ETNK2</i>   | 1   | -0.08         | -0.18   | 0.10    | 0.0004 | 0.03 |
| cg09242541 | <i>APITD1</i>  | 1   | 0.29          | 0.08    | 0.21    | 0.0006 | 0.04 |
| cg18432105 | <i>MYH2</i>    | 17  | 0.16          | 0.12    | 0.04    | 0.001  | 0.06 |
| cg14986136 | <i>WBP5</i>    | X   | -0.19         | 0.01    | -0.19   | 0.001  | 0.06 |
| cg18838701 | <i>TNNI3</i>   | 19  | 0.06          | -0.21   | 0.27    | 0.002  | 0.06 |
| cg06537230 | <i>DLX5</i>    | 7   | 0.13          | -0.06   | 0.19    | 0.002  | 0.06 |
| cg19002579 | <i>SMPX</i>    | X   | 0.22          | -0.05   | 0.27    | 0.002  | 0.06 |
| cg06618866 | <i>TLR2</i>    | 4   | 0.07          | -0.10   | 0.17    | 0.002  | 0.06 |
| cg23196831 | <i>COL14A1</i> | 8   | 0.13          | -0.03   | 0.16    | 0.002  | 0.06 |
| cg01541443 | <i>C7orf41</i> | 7   | -0.01         | 0.17    | -0.18   | 0.002  | 0.06 |

|            |                  |    |       |       |       |       |      |
|------------|------------------|----|-------|-------|-------|-------|------|
| cg19642007 | <i>TNNT3</i>     | 11 | 0.14  | 0.17  | -0.02 | 0.003 | 0.06 |
| cg00176210 | <i>ANK1</i>      | 8  | 0.15  | -0.05 | 0.21  | 0.003 | 0.06 |
| cg02049180 | <i>INSRR</i>     | 1  | 0.01  | 0.22  | -0.21 | 0.003 | 0.06 |
| cg09868035 | <i>C20orf135</i> | 20 | 0.16  | 0.07  | 0.09  | 0.003 | 0.07 |
| cg26227465 | <i>IFNG</i>      | 12 | 0.21  | -0.05 | 0.25  | 0.003 | 0.07 |
| cg20322862 | <i>TGIF1</i>     | 18 | -0.04 | 0.14  | -0.19 | 0.003 | 0.07 |
| cg09404633 | <i>LMOD1</i>     | 1  | 0.19  | -0.03 | 0.22  | 0.004 | 0.07 |
| cg04555771 | <i>CACNA2D2</i>  | 3  | 0.17  | -0.11 | 0.28  | 0.004 | 0.07 |
| cg10467098 | <i>C11orf68</i>  | 11 | -0.06 | 0.14  | -0.21 | 0.005 | 0.08 |
| cg04091078 | <i>SLCO1C1</i>   | 12 | 0.02  | 0.15  | -0.13 | 0.01  | 0.09 |
| cg05570980 | <i>C3orf52</i>   | 3  | 0.05  | -0.13 | 0.17  | 0.01  | 0.09 |
| cg02441647 | <i>COL8A1</i>    | 3  | -0.17 | -0.05 | -0.12 | 0.01  | 0.09 |
| cg18801691 | <i>DCC</i>       | 18 | -0.12 | 0.05  | -0.17 | 0.01  | 0.09 |
| cg21306775 | <i>FLJ44881</i>  | 18 | 0.21  | 0.15  | 0.06  | 0.01  | 0.09 |
| cg14141399 | <i>HAS1</i>      | 19 | 0.20  | 0.11  | 0.10  | 0.01  | 0.09 |
| cg12815142 | <i>SPAG7</i>     | 17 | 0.16  | 0.13  | 0.03  | 0.01  | 0.09 |
| cg14062083 | <i>KRTAP13-4</i> | 21 | 0.16  | 0.14  | 0.02  | 0.01  | 0.09 |
| cg20311730 | <i>NLRP10</i>    | 11 | 0.17  | 0.04  | 0.13  | 0.01  | 0.09 |
| cg00415993 | <i>F2RL2</i>     | 5  | 0.23  | 0.02  | 0.21  | 0.01  | 0.09 |
| cg00318573 | <i>CHRNA4</i>    | 20 | 0.18  | 0.14  | 0.04  | 0.01  | 0.09 |
| cg15350036 | <i>CROT</i>      | 7  | 0.16  | 0.07  | 0.09  | 0.01  | 0.09 |
| cg04993257 | <i>PLAC2</i>     | 19 | 0.18  | 0.10  | 0.08  | 0.01  | 0.09 |
| cg03273615 | <i>RBM41</i>     | X  | 0.18  | 0.07  | 0.11  | 0.01  | 0.09 |
| cg11505048 | <i>APOBEC4</i>   | 1  | -0.05 | 0.11  | -0.16 | 0.01  | 0.09 |
| cg01145396 | <i>CHRNA4</i>    | 2  | 0.16  | 0.01  | 0.15  | 0.01  | 0.09 |
| cg13370916 | <i>STARD8</i>    | X  | 0.18  | 0.06  | 0.12  | 0.01  | 0.09 |
| cg24432916 | <i>SOX3</i>      | X  | 0.16  | 0.02  | 0.14  | 0.01  | 0.10 |
| cg18420965 | <i>EPHA5</i>     | 4  | 0.06  | -0.16 | 0.23  | 0.01  | 0.10 |
| cg08109815 | <i>NMBR</i>      | 6  | 0.11  | -0.15 | 0.26  | 0.01  | 0.10 |
| cg02244695 | <i>TMEM176A</i>  | 7  | 0.06  | -0.13 | 0.19  | 0.01  | 0.10 |
| cg21958798 | <i>GUCY1A2</i>   | 11 | 0.00  | -0.19 | 0.19  | 0.01  | 0.10 |
| cg16176600 | <i>FRK</i>       | 6  | -0.04 | 0.21  | -0.24 | 0.01  | 0.10 |
| cg00179446 | <i>UPF3B</i>     | X  | 0.18  | 0.01  | 0.17  | 0.01  | 0.10 |
| cg22158923 | <i>C7orf52</i>   | 7  | 0.16  | 0.18  | -0.02 | 0.01  | 0.10 |
| cg26135325 | <i>LCE3A</i>     | 1  | 0.20  | 0.11  | 0.09  | 0.01  | 0.10 |
| cg17582777 | <i>EFNA3</i>     | 1  | 0.05  | 0.22  | -0.17 | 0.01  | 0.10 |
| cg15988232 | <i>CSPG5</i>     | 3  | -0.23 | -0.15 | -0.08 | 0.01  | 0.10 |
| cg24693053 | <i>MFSD7</i>     | 4  | 0.03  | -0.13 | 0.16  | 0.01  | 0.10 |
| cg10635061 | <i>FHL2</i>      | 2  | 0.16  | 0.15  | 0.01  | 0.01  | 0.10 |
| cg05467458 | <i>SLC7A9</i>    | 19 | -0.12 | 0.09  | -0.21 | 0.01  | 0.10 |
| cg21400640 | <i>TMSB4X</i>    | X  | 0.20  | 0.00  | 0.20  | 0.01  | 0.10 |
| cg00347729 | <i>MMP10</i>     | 11 | 0.06  | 0.16  | -0.11 | 0.01  | 0.10 |
| cg03562120 | <i>WISP2</i>     | 20 | 0.09  | 0.16  | -0.07 | 0.01  | 0.10 |
| cg00666746 | <i>SYDE1</i>     | 19 | 0.16  | 0.13  | 0.03  | 0.02  | 0.10 |
| cg12949760 | <i>KCNQ1</i>     | 11 | 0.15  | 0.16  | -0.01 | 0.02  | 0.10 |
| cg09040752 | <i>AOC3</i>      | 17 | 0.03  | 0.16  | -0.13 | 0.02  | 0.10 |
| cg05535113 | <i>CHST4</i>     | 16 | 0.10  | -0.14 | 0.24  | 0.02  | 0.10 |

|            |                 |    |       |       |       |      |      |
|------------|-----------------|----|-------|-------|-------|------|------|
| cg24986868 | <i>PKP4</i>     | 2  | 0.15  | 0.03  | 0.12  | 0.02 | 0.10 |
| cg11098259 | <i>AQP9</i>     | 15 | 0.07  | 0.19  | -0.12 | 0.02 | 0.10 |
| cg24522076 | <i>FOXO4</i>    | X  | 0.16  | 0.04  | 0.12  | 0.02 | 0.10 |
| cg07057831 | <i>STX2</i>     | 12 | -0.20 | -0.08 | -0.13 | 0.02 | 0.10 |
| cg13995453 | <i>KLRB1</i>    | 12 | 0.05  | 0.16  | -0.11 | 0.02 | 0.10 |
| cg04456238 | <i>WT1</i>      | 11 | -0.20 | 0.05  | -0.26 | 0.02 | 0.10 |
| cg01532080 | <i>SSBP4</i>    | 19 | 0.02  | -0.13 | 0.15  | 0.02 | 0.10 |
| cg14732540 | <i>BRDT</i>     | 1  | 0.00  | 0.23  | -0.23 | 0.02 | 0.10 |
| cg19504888 | <i>MFF</i>      | 2  | 0.23  | 0.11  | 0.11  | 0.02 | 0.10 |
| cg07156669 | <i>CPD</i>      | 17 | 0.21  | 0.05  | 0.16  | 0.02 | 0.10 |
| cg01643580 | <i>KCNK3</i>    | 2  | 0.10  | -0.12 | 0.22  | 0.02 | 0.10 |
| cg19769182 | <i>PRRT2</i>    | 16 | 0.02  | -0.20 | 0.21  | 0.02 | 0.10 |
| cg02679745 | <i>FUT7</i>     | 9  | 0.17  | -0.07 | 0.24  | 0.02 | 0.10 |
| cg07749074 | <i>HRG</i>      | 3  | 0.17  | 0.11  | 0.06  | 0.02 | 0.10 |
| cg05660795 | <i>IGFBP1</i>   | 7  | 0.10  | -0.13 | 0.22  | 0.02 | 0.10 |
| cg09339527 | <i>ZFP2</i>     | 5  | 0.07  | -0.14 | 0.21  | 0.02 | 0.10 |
| cg22980351 | <i>DCAF12L1</i> | X  | 0.16  | -0.06 | 0.22  | 0.02 | 0.10 |
| cg03258472 | <i>CRB3</i>     | 19 | 0.08  | -0.09 | 0.17  | 0.02 | 0.10 |
| cg22598563 | <i>P4HA2</i>    | 5  | -0.03 | -0.16 | 0.14  | 0.02 | 0.10 |
| cg01309671 | <i>FAM122C</i>  | X  | 0.12  | -0.04 | 0.16  | 0.02 | 0.10 |
| cg22892904 | <i>CBX2</i>     | 17 | 0.09  | -0.16 | 0.25  | 0.02 | 0.10 |
| cg02569613 | <i>C10orf72</i> | 10 | 0.04  | -0.15 | 0.19  | 0.02 | 0.10 |
| cg20588045 | <i>PCDH15</i>   | 10 | 0.15  | -0.07 | 0.22  | 0.02 | 0.10 |
| cg04675937 | <i>CDKN2B</i>   | 9  | -0.16 | 0.01  | -0.17 | 0.02 | 0.10 |
| cg16977035 | <i>ALX4</i>     | 11 | 0.15  | -0.01 | 0.16  | 0.02 | 0.10 |
| cg08241785 | <i>F2RL2</i>    | 5  | 0.15  | -0.06 | 0.21  | 0.02 | 0.10 |
| cg03138668 | <i>SLC17A7</i>  | 19 | -0.07 | -0.18 | 0.11  | 0.02 | 0.10 |
| cg23033024 | <i>CST8</i>     | 20 | 0.10  | 0.16  | -0.05 | 0.02 | 0.10 |
| cg26320696 | <i>PARVA</i>    | 11 | 0.02  | -0.18 | 0.20  | 0.02 | 0.10 |
| cg04975920 | <i>TSPAN1</i>   | 1  | 0.17  | -0.02 | 0.19  | 0.02 | 0.10 |
| cg15425811 | <i>C22orf27</i> | 22 | 0.17  | -0.05 | 0.22  | 0.03 | 0.10 |
| cg25148589 | <i>GRIA2</i>    | 4  | 0.16  | 0.05  | 0.10  | 0.03 | 0.10 |
| cg22971191 | <i>SLC10A2</i>  | 13 | -0.07 | 0.15  | -0.22 | 0.03 | 0.10 |
| cg01112778 | <i>PPP2R2B</i>  | 5  | 0.07  | 0.18  | -0.12 | 0.03 | 0.10 |
| cg02983451 | <i>KLF11</i>    | 2  | 0.01  | -0.14 | 0.16  | 0.03 | 0.11 |
| cg02978737 | <i>PVALB</i>    | 22 | 0.05  | 0.15  | -0.10 | 0.03 | 0.11 |
| cg14611112 | <i>LCN6</i>     | 9  | 0.04  | 0.17  | -0.13 | 0.03 | 0.11 |
| cg20908204 | <i>DMPK</i>     | 19 | 0.23  | 0.13  | 0.09  | 0.03 | 0.11 |
| cg18433380 | <i>NNAT</i>     | 20 | 0.16  | 0.09  | 0.06  | 0.03 | 0.11 |
| cg06933965 | <i>CMKLR1</i>   | 12 | 0.17  | -0.01 | 0.18  | 0.03 | 0.11 |
| cg06851207 | <i>PNMAL1</i>   | 19 | -0.12 | 0.16  | -0.29 | 0.03 | 0.11 |
| cg15787039 | <i>SCG5</i>     | 15 | 0.16  | -0.04 | 0.21  | 0.03 | 0.11 |
| cg19945840 | <i>B3GALT6</i>  | 1  | 0.14  | -0.08 | 0.22  | 0.03 | 0.11 |
| cg02847500 | <i>SOX3</i>     | X  | 0.15  | -0.02 | 0.18  | 0.03 | 0.11 |
| cg05836145 | <i>SP8</i>      | 7  | 0.13  | -0.06 | 0.19  | 0.03 | 0.11 |
| cg09059635 | <i>NTNG2</i>    | 9  | 0.14  | -0.07 | 0.21  | 0.03 | 0.11 |
| cg04005707 | <i>CWH43</i>    | 4  | 0.18  | 0.08  | 0.10  | 0.03 | 0.11 |

|            |                 |    |       |       |       |      |      |
|------------|-----------------|----|-------|-------|-------|------|------|
| cg21934269 | <i>RPL39</i>    | X  | -0.06 | 0.12  | -0.18 | 0.03 | 0.11 |
| cg07732644 | <i>ASPA</i>     | 17 | 0.05  | 0.18  | -0.12 | 0.03 | 0.11 |
| cg18006568 | <i>ANKRD53</i>  | 2  | 0.09  | -0.07 | 0.16  | 0.03 | 0.11 |
| cg14520892 | <i>POLA1</i>    | X  | 0.15  | 0.04  | 0.11  | 0.03 | 0.11 |
| cg12135976 | <i>SLC5A8</i>   | 12 | 0.05  | -0.11 | 0.16  | 0.03 | 0.11 |
| cg26251865 | <i>IRGC</i>     | 19 | 0.16  | 0.08  | 0.08  | 0.03 | 0.11 |
| cg18641937 | <i>ITLN2</i>    | 1  | 0.14  | -0.07 | 0.21  | 0.03 | 0.11 |
| cg12864235 | <i>CDH9</i>     | 5  | 0.02  | 0.21  | -0.19 | 0.03 | 0.11 |
| cg16682903 | <i>ACVR1</i>    | 2  | 0.05  | 0.15  | -0.10 | 0.03 | 0.11 |
| cg23704362 | <i>C8orf46</i>  | 8  | -0.06 | 0.14  | -0.20 | 0.03 | 0.11 |
| cg20506783 | <i>ARHGAP22</i> | 10 | -0.16 | 0.05  | -0.21 | 0.03 | 0.11 |
| cg22224704 | <i>GSTP1</i>    | 11 | 0.19  | 0.11  | 0.08  | 0.04 | 0.11 |
| cg15819333 | <i>COX4I1</i>   | 16 | -0.15 | -0.12 | -0.04 | 0.04 | 0.11 |
| cg12434779 | <i>ARHGAP6</i>  | X  | 0.14  | -0.04 | 0.18  | 0.04 | 0.11 |
| cg05706061 | <i>SLC31A2</i>  | 9  | -0.18 | 0.06  | -0.23 | 0.04 | 0.11 |
| cg05389183 | <i>PPIC</i>     | 5  | -0.17 | -0.03 | -0.14 | 0.04 | 0.11 |
| cg01782486 | <i>ZBTB7B</i>   | 1  | 0.15  | 0.08  | 0.07  | 0.04 | 0.11 |
| cg01880569 | <i>CDH13</i>    | 16 | -0.16 | 0.09  | -0.25 | 0.04 | 0.11 |
| cg06811800 | <i>ATP4B</i>    | 13 | 0.05  | 0.18  | -0.14 | 0.04 | 0.11 |
| cg05260966 | <i>TIMP3</i>    | 22 | 0.17  | 0.07  | 0.11  | 0.04 | 0.11 |
| cg11320084 | <i>RNF2</i>     | 1  | 0.21  | 0.04  | 0.17  | 0.04 | 0.11 |
| cg22461835 | <i>ADRA1A</i>   | 8  | 0.07  | -0.13 | 0.20  | 0.04 | 0.11 |
| cg04317399 | <i>HOXA4</i>    | 7  | 0.17  | -0.04 | 0.21  | 0.04 | 0.11 |
| cg08508325 | <i>CARS</i>     | 11 | -0.18 | -0.10 | -0.07 | 0.04 | 0.11 |
| cg13488201 | <i>ADAM12</i>   | 10 | 0.10  | -0.07 | 0.17  | 0.04 | 0.11 |
| cg24995836 | <i>GABRA3</i>   | X  | 0.07  | -0.09 | 0.16  | 0.04 | 0.11 |
| cg19403023 | <i>TESSP1</i>   | 16 | 0.20  | 0.04  | 0.16  | 0.04 | 0.11 |
| cg12610070 | <i>TSPAN15</i>  | 10 | 0.09  | 0.16  | -0.07 | 0.04 | 0.11 |
| cg25431974 | <i>ECEL1</i>    | 2  | 0.15  | 0.03  | 0.13  | 0.04 | 0.11 |
| cg12348970 | <i>SLC24A2</i>  | 9  | 0.12  | 0.17  | -0.05 | 0.04 | 0.11 |
| cg00344372 | <i>HGFAC</i>    | 4  | 0.12  | -0.07 | 0.19  | 0.04 | 0.11 |
| cg13473336 | <i>SLC5A2</i>   | 16 | 0.02  | 0.18  | -0.16 | 0.04 | 0.11 |
| cg01851399 | <i>PKP2</i>     | 12 | 0.01  | -0.16 | 0.17  | 0.04 | 0.11 |
| cg14338887 | <i>GNMT</i>     | 6  | -0.03 | -0.19 | 0.15  | 0.04 | 0.11 |
| cg13269407 | <i>C22orf26</i> | 22 | 0.25  | 0.22  | 0.03  | 0.04 | 0.11 |
| cg17861230 | <i>PDE4C</i>    | 19 | 0.19  | 0.07  | 0.12  | 0.04 | 0.11 |
| cg08927738 | <i>BCAS1</i>    | 20 | 0.21  | 0.10  | 0.10  | 0.04 | 0.12 |
| cg04037732 | <i>NLGN3</i>    | X  | 0.19  | 0.08  | 0.12  | 0.04 | 0.12 |
| cg09523691 | <i>ATG12</i>    | 5  | -0.02 | 0.14  | -0.16 | 0.04 | 0.12 |
| cg13883681 | <i>GOT2</i>     | 16 | -0.04 | 0.14  | -0.19 | 0.04 | 0.12 |
| cg05055150 | <i>MAG</i>      | 19 | -0.16 | 0.00  | -0.16 | 0.04 | 0.12 |
| cg06454226 | <i>METTL4</i>   | 18 | 0.21  | 0.06  | 0.16  | 0.04 | 0.12 |
| cg16022279 | <i>ZNF185</i>   | X  | -0.01 | 0.15  | -0.16 | 0.04 | 0.12 |
| cg01813965 | <i>CCDC135</i>  | 16 | 0.17  | 0.13  | 0.04  | 0.05 | 0.12 |
| cg07705908 | <i>SPDEF</i>    | 6  | 0.04  | 0.16  | -0.12 | 0.05 | 0.12 |
| cg11619390 | <i>ZBTB8A</i>   | 1  | 0.18  | 0.02  | 0.15  | 0.05 | 0.12 |
| cg16935609 | <i>SRD5A1</i>   | 5  | -0.09 | 0.09  | -0.18 | 0.05 | 0.12 |

|            |                 |    |       |       |       |      |      |
|------------|-----------------|----|-------|-------|-------|------|------|
| cg11115702 | <i>SPNS1</i>    | 16 | -0.04 | -0.17 | 0.14  | 0.05 | 0.12 |
| cg06750167 | <i>TESC</i>     | 12 | 0.18  | 0.02  | 0.16  | 0.05 | 0.12 |
| cg20781967 | <i>NINJ2</i>    | 12 | 0.07  | -0.14 | 0.21  | 0.05 | 0.13 |
| cg01526089 | <i>P2RX1</i>    | 17 | 0.24  | -0.04 | 0.27  | 0.05 | 0.13 |
| cg10660256 | <i>BHMT</i>     | 5  | 0.02  | -0.16 | 0.18  | 0.05 | 0.13 |
| cg17095731 | <i>LRP8</i>     | 1  | 0.23  | 0.08  | 0.15  | 0.05 | 0.13 |
| cg14724265 | <i>PPEF2</i>    | 4  | 0.15  | -0.03 | 0.18  | 0.05 | 0.13 |
| cg08935301 | <i>LMCD1</i>    | 3  | -0.09 | 0.13  | -0.21 | 0.05 | 0.13 |
| cg08263647 | <i>LXN</i>      | 3  | -0.05 | -0.17 | 0.12  | 0.05 | 0.13 |
| cg21856603 | <i>ITGAE</i>    | 17 | 0.18  | -0.05 | 0.22  | 0.05 | 0.13 |
| cg19668234 | <i>PRSS50</i>   | 3  | 0.17  | -0.06 | 0.23  | 0.05 | 0.13 |
| cg10161121 | <i>FASLG</i>    | 1  | 0.02  | 0.16  | -0.14 | 0.05 | 0.13 |
| cg20774846 | <i>DPYS</i>     | 8  | 0.12  | 0.16  | -0.04 | 0.05 | 0.13 |
| cg04058169 | <i>BUB3</i>     | 10 | 0.17  | 0.09  | 0.08  | 0.05 | 0.13 |
| cg26354398 | <i>RGS3</i>     | 9  | 0.06  | 0.16  | -0.11 | 0.06 | 0.13 |
| cg10670077 | <i>INSR</i>     | 19 | 0.15  | 0.00  | 0.16  | 0.06 | 0.13 |
| cg09280976 | <i>MEG3</i>     | 14 | -0.05 | 0.11  | -0.16 | 0.06 | 0.13 |
| cg03918304 | <i>HOXD10</i>   | 2  | 0.17  | 0.01  | 0.16  | 0.06 | 0.13 |
| cg21410991 | <i>ISL1</i>     | 5  | 0.14  | -0.06 | 0.20  | 0.06 | 0.13 |
| cg20792062 | <i>KCNA5</i>    | 12 | 0.01  | -0.14 | 0.16  | 0.06 | 0.13 |
| cg01805282 | <i>EYA4</i>     | 6  | -0.01 | -0.20 | 0.19  | 0.06 | 0.13 |
| cg08586737 | <i>GCC1</i>     | 7  | 0.13  | -0.07 | 0.20  | 0.06 | 0.13 |
| cg18946226 | <i>MYO16</i>    | 13 | -0.13 | 0.07  | -0.20 | 0.06 | 0.13 |
| cg12638745 | <i>LCA5L</i>    | 21 | 0.17  | 0.12  | 0.05  | 0.06 | 0.13 |
| cg02218324 | <i>RSPH6A</i>   | 19 | 0.19  | 0.07  | 0.12  | 0.06 | 0.13 |
| cg20798152 | <i>CARTPT</i>   | 5  | -0.10 | 0.08  | -0.18 | 0.06 | 0.13 |
| cg20469837 | <i>GALNT5</i>   | 2  | 0.17  | -0.01 | 0.19  | 0.06 | 0.13 |
| cg26394940 | <i>C22orf26</i> | 22 | 0.22  | 0.17  | 0.05  | 0.06 | 0.13 |
| cg09848074 | <i>KLRG2</i>    | 7  | 0.13  | 0.19  | -0.06 | 0.06 | 0.13 |
| cg13749822 | <i>HHIP</i>     | 4  | 0.11  | 0.19  | -0.08 | 0.06 | 0.13 |
| cg26581729 | <i>NPDC1</i>    | 9  | -0.08 | 0.16  | -0.24 | 0.06 | 0.13 |
| cg09816471 | <i>SNN</i>      | 16 | 0.12  | -0.17 | 0.29  | 0.06 | 0.13 |
| cg23545272 | <i>EFNB1</i>    | X  | 0.15  | 0.09  | 0.07  | 0.06 | 0.13 |
| cg24132694 | <i>SNAPC2</i>   | 19 | -0.19 | 0.06  | -0.25 | 0.06 | 0.13 |
| cg18743730 | <i>CA4</i>      | 17 | 0.14  | -0.02 | 0.16  | 0.07 | 0.13 |
| cg00708598 | <i>LECT1</i>    | 13 | 0.05  | -0.10 | 0.16  | 0.07 | 0.13 |
| cg12108912 | <i>TMEM177</i>  | 2  | 0.00  | 0.16  | -0.16 | 0.07 | 0.13 |
| cg15096140 | <i>MYO1B</i>    | 2  | -0.18 | 0.09  | -0.27 | 0.07 | 0.13 |
| cg02131995 | <i>HAMP</i>     | 19 | 0.14  | -0.08 | 0.22  | 0.07 | 0.13 |
| cg22016649 | <i>PNPLA2</i>   | 11 | -0.12 | 0.10  | -0.22 | 0.07 | 0.13 |
| cg02888247 | <i>C6orf62</i>  | 6  | -0.10 | 0.06  | -0.16 | 0.07 | 0.14 |
| cg17067005 | <i>IL10</i>     | 1  | 0.19  | -0.02 | 0.21  | 0.07 | 0.14 |
| cg21109025 | <i>CCL2</i>     | 17 | 0.03  | 0.19  | -0.16 | 0.07 | 0.14 |
| cg09947274 | <i>CAD</i>      | 2  | 0.06  | 0.15  | -0.09 | 0.07 | 0.14 |
| cg24477567 | <i>EPOR</i>     | 19 | 0.21  | 0.03  | 0.18  | 0.07 | 0.14 |
| cg12619509 | <i>DNASE1L2</i> | 16 | 0.06  | -0.15 | 0.20  | 0.07 | 0.14 |
| cg25978208 | <i>SNRPN</i>    | 15 | 0.10  | -0.07 | 0.17  | 0.07 | 0.14 |



|            |                 |    |       |       |       |      |      |
|------------|-----------------|----|-------|-------|-------|------|------|
| cg03330058 | <i>ABTB1</i>    | 3  | 0.20  | 0.11  | 0.10  | 0.07 | 0.14 |
| cg20857253 | <i>TCP10L</i>   | 21 | -0.14 | -0.20 | 0.05  | 0.07 | 0.14 |
| cg10756887 | <i>C22orf15</i> | 22 | 0.03  | -0.15 | 0.18  | 0.07 | 0.14 |
| cg06657741 | <i>SLC9A6</i>   | X  | -0.08 | 0.08  | -0.17 | 0.07 | 0.14 |
| cg16046465 | <i>FRMD5</i>    | 15 | -0.01 | -0.16 | 0.15  | 0.07 | 0.14 |
| cg19859270 | <i>GPR15</i>    | 3  | 0.21  | 0.08  | 0.13  | 0.07 | 0.14 |
| cg16632715 | <i>HOXD11</i>   | 2  | 0.07  | -0.08 | 0.15  | 0.08 | 0.14 |
| cg24429836 | <i>LDHD</i>     | 16 | 0.07  | 0.16  | -0.09 | 0.08 | 0.14 |
| cg07103493 | <i>SLC27A6</i>  | 5  | 0.03  | -0.15 | 0.18  | 0.08 | 0.14 |
| cg08416046 | <i>IRS4</i>     | X  | 0.13  | -0.04 | 0.16  | 0.08 | 0.14 |
| cg15539420 | <i>HOXB8</i>    | 17 | 0.08  | -0.12 | 0.20  | 0.08 | 0.14 |
| cg23855093 | <i>GPR128</i>   | 3  | -0.11 | 0.08  | -0.19 | 0.08 | 0.14 |
| cg06710648 | <i>DAB1</i>     | 1  | -0.04 | -0.18 | 0.14  | 0.08 | 0.14 |
| cg03387723 | <i>SCMH1</i>    | 1  | -0.20 | -0.09 | -0.11 | 0.08 | 0.14 |
| cg22870280 | <i>BCL2L10</i>  | 15 | 0.09  | 0.18  | -0.08 | 0.08 | 0.14 |
| cg09924998 | <i>VPS33A</i>   | 12 | -0.09 | 0.11  | -0.21 | 0.08 | 0.14 |
| cg18727700 | <i>SRPX2</i>    | X  | 0.15  | 0.11  | 0.04  | 0.08 | 0.15 |
| cg01988129 | <i>ADHFE1</i>   | 8  | 0.05  | -0.16 | 0.21  | 0.08 | 0.15 |
| cg00846036 | <i>DLG2</i>     | 11 | 0.12  | 0.20  | -0.08 | 0.08 | 0.15 |
| cg09573795 | <i>MSX1</i>     | 4  | 0.12  | -0.07 | 0.19  | 0.08 | 0.15 |
| cg19055639 | <i>ARMCX2</i>   | X  | 0.14  | -0.01 | 0.15  | 0.08 | 0.15 |
| cg00278366 | <i>RAD9B</i>    | 12 | -0.06 | 0.10  | -0.16 | 0.09 | 0.15 |
| cg22830895 | <i>CRYGN</i>    | 7  | 0.04  | 0.15  | -0.11 | 0.09 | 0.15 |
| cg19384697 | <i>UPK3B</i>    | 7  | 0.13  | 0.15  | -0.02 | 0.09 | 0.15 |
| cg06263495 | <i>ASCL2</i>    | 11 | 0.05  | -0.11 | 0.16  | 0.09 | 0.15 |
| cg01593385 | <i>FGG</i>      | 4  | 0.04  | 0.16  | -0.12 | 0.09 | 0.15 |
| cg25201363 | <i>LRPAP1</i>   | 4  | 0.16  | 0.08  | 0.08  | 0.09 | 0.15 |
| cg22375192 | <i>IGF1R</i>    | 15 | 0.02  | -0.14 | 0.16  | 0.09 | 0.15 |
| cg04513422 | <i>C13orf29</i> | 13 | 0.10  | -0.12 | 0.22  | 0.09 | 0.15 |
| cg04123409 | <i>SDS</i>      | 12 | 0.08  | -0.08 | 0.16  | 0.09 | 0.15 |
| cg03534410 | <i>TMEM40</i>   | 3  | 0.16  | 0.06  | 0.10  | 0.09 | 0.15 |
| cg20831708 | <i>SEC31B</i>   | 10 | 0.04  | -0.17 | 0.21  | 0.09 | 0.15 |
| cg03743584 | <i>PRAP1</i>    | 10 | 0.13  | -0.05 | 0.19  | 0.09 | 0.15 |
| cg15262984 | <i>UBE2D4</i>   | 7  | 0.02  | -0.14 | 0.15  | 0.10 | 0.16 |
| cg15422147 | <i>SERPINB5</i> | 18 | -0.04 | 0.14  | -0.17 | 0.10 | 0.16 |
| cg15146752 | <i>EPHA2</i>    | 1  | -0.11 | 0.09  | -0.20 | 0.10 | 0.16 |
| cg16449464 | <i>MAP1D</i>    | 2  | -0.03 | 0.16  | -0.19 | 0.10 | 0.16 |
| cg18849169 | <i>GPX3</i>     | 5  | -0.08 | 0.08  | -0.16 | 0.10 | 0.16 |
| cg20092036 | <i>UBE3B</i>    | 12 | 0.16  | 0.02  | 0.14  | 0.10 | 0.16 |
| cg22035229 | <i>MSH4</i>     | 1  | -0.02 | 0.13  | -0.15 | 0.10 | 0.16 |
| cg15383120 | <i>DUSP22</i>   | 6  | 0.09  | -0.14 | 0.24  | 0.10 | 0.16 |
| cg24447042 | <i>SMARCA1</i>  | X  | 0.11  | -0.04 | 0.15  | 0.10 | 0.16 |
| cg26609631 | <i>GSX1</i>     | 13 | 0.09  | -0.07 | 0.15  | 0.10 | 0.16 |
| cg20269537 | <i>ATXN10</i>   | 22 | -0.09 | 0.10  | -0.18 | 0.10 | 0.16 |
| cg17421623 | <i>KTELC1</i>   | 3  | -0.04 | 0.15  | -0.20 | 0.10 | 0.16 |
| cg07959477 | <i>CLEC1A</i>   | 12 | -0.07 | 0.11  | -0.17 | 0.10 | 0.16 |
| cg14550066 | <i>NCR1</i>     | 19 | 0.16  | 0.01  | 0.15  | 0.10 | 0.16 |

|            |                     |    |       |       |       |      |      |
|------------|---------------------|----|-------|-------|-------|------|------|
| cg19815720 | <i>HTR3C</i>        | 3  | -0.08 | 0.08  | -0.16 | 0.10 | 0.16 |
| cg00615377 | <i>RBM9</i>         | 22 | 0.06  | -0.11 | 0.17  | 0.10 | 0.16 |
| cg25344672 | <i>C9orf171</i>     | 9  | 0.15  | -0.06 | 0.21  | 0.10 | 0.16 |
| cg06675478 | <i>SOX1</i>         | 13 | 0.11  | -0.04 | 0.15  | 0.11 | 0.16 |
| cg16051685 | <i>TRIM63</i>       | 1  | 0.14  | -0.02 | 0.15  | 0.11 | 0.16 |
| cg08145625 | <i>TRAM1L1</i>      | 4  | 0.05  | -0.13 | 0.18  | 0.11 | 0.16 |
| cg02735486 | <i>ANK2</i>         | 4  | 0.08  | -0.11 | 0.19  | 0.11 | 0.16 |
| cg20723355 | <i>FBXO39</i>       | 17 | 0.16  | 0.01  | 0.15  | 0.11 | 0.16 |
| cg23065097 | <i>FKBP1B</i>       | 2  | 0.02  | 0.18  | -0.16 | 0.11 | 0.16 |
| cg06432655 | <i>CLIP3</i>        | 19 | 0.15  | 0.03  | 0.12  | 0.11 | 0.17 |
| cg18536148 | <i>TBX4</i>         | 17 | -0.06 | -0.16 | 0.10  | 0.11 | 0.17 |
| cg17408686 | <i>CHCHD6</i>       | 3  | 0.06  | -0.13 | 0.19  | 0.11 | 0.17 |
| cg22799132 | <i>TRPC5</i>        | X  | 0.09  | -0.10 | 0.19  | 0.11 | 0.17 |
| cg10076009 | <i>SMARCA1</i>      | X  | -0.15 | -0.03 | -0.13 | 0.11 | 0.17 |
| cg20648149 | <i>SYNE2</i>        | 14 | -0.07 | 0.10  | -0.17 | 0.11 | 0.17 |
| cg23771929 | <i>FREQ</i>         | 9  | -0.16 | -0.07 | -0.08 | 0.11 | 0.17 |
| cg10189695 | <i>GPR78</i>        | 4  | 0.07  | -0.15 | 0.21  | 0.11 | 0.17 |
| cg20587168 | <i>ACTL9</i>        | 19 | 0.16  | 0.09  | 0.07  | 0.11 | 0.17 |
| cg13842648 | <i>IL9</i>          | 5  | -0.04 | 0.16  | -0.20 | 0.12 | 0.17 |
| cg24710073 | <i>TBP</i>          | 6  | 0.00  | 0.17  | -0.18 | 0.12 | 0.17 |
| cg24516901 | <i>FAM124B</i>      | 2  | 0.04  | -0.11 | 0.16  | 0.12 | 0.17 |
| cg10608341 | <i>HESX1</i>        | 3  | 0.05  | 0.18  | -0.14 | 0.12 | 0.17 |
| cg04995717 | <i>TEK</i>          | 9  | 0.16  | 0.09  | 0.07  | 0.12 | 0.17 |
| cg22016571 | <i>RP6-213H19.1</i> | X  | 0.06  | -0.09 | 0.15  | 0.12 | 0.17 |
| cg18438777 | <i>NPY5R</i>        | 4  | 0.11  | -0.04 | 0.15  | 0.12 | 0.17 |
| cg09893305 | <i>HAPLN1</i>       | 5  | -0.20 | -0.03 | -0.18 | 0.12 | 0.17 |
| cg03330678 | <i>SEPT9</i>        | 17 | -0.11 | 0.08  | -0.19 | 0.12 | 0.17 |
| cg00418150 | <i>ALX4</i>         | 11 | 0.06  | -0.10 | 0.16  | 0.12 | 0.17 |
| cg08812936 | <i>KCNMB2</i>       | 3  | 0.14  | -0.04 | 0.18  | 0.13 | 0.18 |
| cg22189019 | <i>FGF22</i>        | 19 | 0.20  | 0.04  | 0.15  | 0.13 | 0.18 |
| cg13950558 | <i>BLOC1S3</i>      | 19 | -0.11 | 0.05  | -0.17 | 0.13 | 0.18 |
| cg13633026 | <i>MS4A8B</i>       | 11 | 0.10  | -0.07 | 0.16  | 0.13 | 0.18 |
| cg15684563 | <i>TSPAN8</i>       | 12 | 0.18  | 0.06  | 0.13  | 0.13 | 0.18 |
| cg12473775 | <i>RHOD</i>         | 11 | 0.13  | 0.19  | -0.06 | 0.13 | 0.18 |
| cg26201213 | <i>MGMT</i>         | 10 | -0.11 | 0.05  | -0.16 | 0.13 | 0.18 |
| cg24854010 | <i>WNT5B</i>        | 12 | -0.04 | 0.16  | -0.20 | 0.13 | 0.18 |
| cg22678136 | <i>SNRPN</i>        | 15 | 0.18  | 0.04  | 0.14  | 0.13 | 0.18 |
| cg14944269 | <i>RAB15</i>        | 14 | -0.18 | -0.04 | -0.14 | 0.14 | 0.18 |
| cg16615211 | <i>TMEM42</i>       | 3  | 0.02  | 0.17  | -0.15 | 0.14 | 0.18 |
| cg23878206 | <i>ATF5</i>         | 19 | -0.05 | 0.10  | -0.15 | 0.14 | 0.18 |
| cg14473924 | <i>PDZRN3</i>       | 3  | 0.12  | -0.03 | 0.16  | 0.14 | 0.19 |
| cg11822932 | <i>LMO2</i>         | 11 | 0.18  | -0.03 | 0.21  | 0.14 | 0.19 |
| cg18752854 | <i>TNS1</i>         | 2  | -0.02 | 0.13  | -0.15 | 0.14 | 0.19 |
| cg14861570 | <i>MMD</i>          | 17 | 0.01  | 0.16  | -0.15 | 0.14 | 0.19 |
| cg15720535 | <i>AGPAT2</i>       | 9  | -0.14 | 0.06  | -0.20 | 0.14 | 0.19 |
| cg04001333 | <i>FLVCR2</i>       | 14 | 0.17  | -0.02 | 0.19  | 0.14 | 0.19 |
| cg13530039 | <i>CHRM1</i>        | 11 | 0.03  | 0.16  | -0.13 | 0.14 | 0.19 |

|            |                  |    |       |       |       |      |      |
|------------|------------------|----|-------|-------|-------|------|------|
| cg09245073 | <i>ASGR1</i>     | 17 | 0.15  | 0.10  | 0.06  | 0.14 | 0.19 |
| cg15284635 | <i>SLC6A11</i>   | 3  | 0.07  | -0.10 | 0.17  | 0.14 | 0.19 |
| cg16842214 | <i>KBTBD5</i>    | 3  | -0.07 | 0.09  | -0.16 | 0.15 | 0.19 |
| cg03382797 | <i>C9orf98</i>   | 9  | 0.13  | -0.03 | 0.16  | 0.15 | 0.19 |
| cg24585690 | <i>IL9</i>       | 5  | -0.04 | 0.16  | -0.20 | 0.15 | 0.19 |
| cg06048973 | <i>ACTC1</i>     | 15 | 0.13  | 0.17  | -0.05 | 0.15 | 0.19 |
| cg12006284 | <i>WT1</i>       | 11 | -0.06 | 0.15  | -0.21 | 0.15 | 0.20 |
| cg02085507 | <i>TRIP10</i>    | 19 | -0.02 | 0.14  | -0.17 | 0.15 | 0.20 |
| cg07285276 | <i>RAPGEF1</i>   | 9  | -0.01 | 0.18  | -0.19 | 0.15 | 0.20 |
| cg02628202 | <i>LGMN</i>      | 14 | -0.15 | -0.05 | -0.10 | 0.15 | 0.20 |
| cg13446199 | <i>PSCA</i>      | 8  | 0.05  | 0.18  | -0.13 | 0.16 | 0.20 |
| cg22815110 | <i>FOXD3</i>     | 1  | 0.06  | -0.10 | 0.16  | 0.16 | 0.20 |
| cg25979644 | <i>ATP8B1</i>    | 18 | -0.06 | 0.13  | -0.19 | 0.16 | 0.20 |
| cg01154537 | <i>C10orf4</i>   | 10 | -0.01 | -0.16 | 0.15  | 0.16 | 0.20 |
| cg23741330 | <i>FAM26E</i>    | 6  | 0.12  | -0.03 | 0.16  | 0.16 | 0.20 |
| cg14992108 | <i>SNTB1</i>     | 8  | -0.07 | 0.08  | -0.15 | 0.16 | 0.20 |
| cg01946401 | <i>RUNX2</i>     | 6  | 0.06  | 0.16  | -0.10 | 0.16 | 0.20 |
| cg25697314 | <i>IL26</i>      | 12 | -0.08 | 0.09  | -0.17 | 0.16 | 0.21 |
| cg21126707 | <i>MYF5</i>      | 12 | 0.12  | -0.04 | 0.16  | 0.17 | 0.21 |
| cg02417408 | <i>PPM1M</i>     | 3  | -0.10 | 0.06  | -0.16 | 0.17 | 0.21 |
| cg03544320 | <i>CRMP1</i>     | 4  | 0.20  | 0.04  | 0.16  | 0.17 | 0.21 |
| cg20322977 | <i>CYP26C1</i>   | 10 | 0.14  | -0.01 | 0.15  | 0.17 | 0.21 |
| cg19868730 | <i>POPDC2</i>    | 3  | 0.08  | -0.11 | 0.19  | 0.17 | 0.21 |
| cg00816620 | <i>C1orf25</i>   | 1  | 0.14  | -0.05 | 0.18  | 0.17 | 0.21 |
| cg24389359 | <i>CCDC63</i>    | 12 | -0.15 | -0.15 | 0.00  | 0.17 | 0.21 |
| cg07054641 | <i>WDR52</i>     | 3  | 0.09  | -0.11 | 0.20  | 0.17 | 0.21 |
| cg10282491 | <i>CLDN9</i>     | 16 | -0.09 | 0.09  | -0.18 | 0.18 | 0.21 |
| cg21256649 | <i>PRKAR1A</i>   | 17 | -0.16 | -0.04 | -0.12 | 0.18 | 0.22 |
| cg09081544 | <i>MUC13</i>     | 3  | 0.13  | -0.06 | 0.19  | 0.18 | 0.22 |
| cg01888601 | <i>AGBL2</i>     | 11 | 0.02  | 0.17  | -0.14 | 0.18 | 0.22 |
| cg07688613 | <i>INTS3</i>     | 1  | -0.13 | 0.03  | -0.16 | 0.18 | 0.22 |
| cg00202711 | <i>HTR2C</i>     | X  | -0.14 | 0.01  | -0.16 | 0.18 | 0.22 |
| cg08558340 | <i>SRRT</i>      | 7  | -0.08 | 0.08  | -0.16 | 0.19 | 0.22 |
| cg12467090 | <i>PIK3C2B</i>   | 1  | 0.11  | -0.05 | 0.16  | 0.19 | 0.22 |
| cg16080552 | <i>TACSTD2</i>   | 1  | -0.15 | 0.02  | -0.17 | 0.19 | 0.23 |
| cg00698688 | <i>SULT2B1</i>   | 19 | 0.00  | 0.15  | -0.15 | 0.19 | 0.23 |
| cg24194775 | <i>NPR2</i>      | 9  | 0.01  | -0.15 | 0.16  | 0.19 | 0.23 |
| cg17166338 | <i>TERT</i>      | 5  | 0.04  | 0.18  | -0.14 | 0.19 | 0.23 |
| cg02498063 | <i>CCDC60</i>    | 12 | 0.09  | -0.06 | 0.15  | 0.20 | 0.23 |
| cg01870826 | <i>LOC389458</i> | 7  | 0.11  | -0.06 | 0.17  | 0.20 | 0.23 |
| cg11428724 | <i>PAX7</i>      | 1  | 0.10  | -0.06 | 0.16  | 0.20 | 0.23 |
| cg24652919 | <i>THOC6</i>     | 16 | 0.16  | -0.01 | 0.17  | 0.20 | 0.23 |
| cg12762799 | <i>CLEC4E</i>    | 12 | 0.09  | -0.07 | 0.17  | 0.20 | 0.23 |
| cg15989091 | <i>LOXL3</i>     | 2  | 0.15  | -0.05 | 0.20  | 0.21 | 0.24 |
| cg01757745 | <i>C10orf93</i>  | 10 | 0.13  | -0.04 | 0.18  | 0.21 | 0.24 |
| cg21742836 | <i>PPP4C</i>     | 16 | -0.13 | 0.06  | -0.19 | 0.22 | 0.25 |
| cg21418052 | <i>B3GALTL</i>   | 13 | -0.13 | 0.05  | -0.17 | 0.22 | 0.25 |

|            |          |    |       |       |       |      |      |
|------------|----------|----|-------|-------|-------|------|------|
| cg17387870 | CHFR     | 12 | 0.01  | 0.18  | -0.16 | 0.22 | 0.25 |
| cg24471894 | KIAA0020 | 9  | 0.15  | 0.09  | 0.06  | 0.22 | 0.25 |
| cg02250594 | ONECUT2  | 18 | 0.10  | -0.05 | 0.16  | 0.22 | 0.25 |
| cg24211388 | AIF1     | 6  | 0.07  | -0.11 | 0.18  | 0.23 | 0.25 |
| cg11235426 | DUSP22   | 6  | 0.13  | -0.09 | 0.22  | 0.23 | 0.26 |
| cg22778981 | ERBB2    | 17 | 0.12  | -0.10 | 0.22  | 0.23 | 0.26 |
| cg10281770 | WDR45L   | 17 | -0.03 | 0.14  | -0.18 | 0.23 | 0.26 |
| cg00242839 | RBM17    | 10 | -0.01 | 0.16  | -0.16 | 0.24 | 0.26 |
| cg19007731 | RUNX1T1  | 8  | 0.13  | -0.03 | 0.16  | 0.24 | 0.26 |
| cg01386493 | ADRB3    | 8  | -0.09 | 0.06  | -0.16 | 0.24 | 0.27 |
| cg08861115 | IL1F9    | 2  | -0.03 | 0.15  | -0.18 | 0.24 | 0.27 |
| cg12552392 | NFS1     | 20 | -0.18 | -0.08 | -0.10 | 0.24 | 0.27 |
| cg23418591 | APCDD1L  | 20 | -0.07 | 0.09  | -0.16 | 0.25 | 0.27 |
| cg26279025 | IL11     | 19 | -0.06 | 0.09  | -0.15 | 0.25 | 0.27 |
| cg09548084 | SLC35B3  | 6  | 0.17  | 0.03  | 0.14  | 0.25 | 0.27 |
| cg22282672 | ZNF474   | 5  | 0.09  | 0.16  | -0.07 | 0.26 | 0.28 |
| cg06268694 | CELSR1   | 22 | 0.07  | -0.11 | 0.18  | 0.26 | 0.28 |
| cg13745870 | SPATA12  | 3  | 0.15  | 0.05  | 0.10  | 0.26 | 0.28 |
| cg18979223 | CDKN2B   | 9  | -0.11 | 0.06  | -0.17 | 0.26 | 0.28 |
| cg07314984 | PHKA2    | X  | -0.10 | 0.05  | -0.15 | 0.26 | 0.28 |
| cg12936220 | RPL26L1  | 5  | -0.08 | 0.09  | -0.17 | 0.27 | 0.29 |
| cg14483391 | HTR3D    | 3  | 0.06  | -0.10 | 0.17  | 0.28 | 0.29 |
| cg07974891 | ITGB1BP1 | 2  | 0.08  | -0.07 | 0.15  | 0.28 | 0.29 |
| cg25003924 | ARPP19   | 15 | -0.11 | 0.05  | -0.16 | 0.28 | 0.29 |
| cg02863947 | NR1I2    | 3  | 0.13  | -0.03 | 0.16  | 0.29 | 0.31 |
| cg03439703 | PDE3B    | 11 | 0.16  | 0.09  | 0.07  | 0.29 | 0.31 |
| cg17003970 | CHFR     | 12 | 0.12  | 0.17  | -0.05 | 0.29 | 0.31 |
| cg04645174 | OR7A17   | 19 | -0.11 | 0.04  | -0.15 | 0.30 | 0.32 |
| cg11052143 | ALS2CR11 | 2  | 0.05  | -0.11 | 0.16  | 0.30 | 0.32 |
| cg22747092 | NACC2    | 9  | 0.09  | -0.08 | 0.17  | 0.30 | 0.32 |
| cg10978355 | CKMT2    | 5  | -0.09 | -0.16 | 0.07  | 0.31 | 0.33 |
| cg17264618 | ENTPD3   | 3  | 0.07  | -0.09 | 0.16  | 0.31 | 0.33 |
| cg08126211 | KAAG1    | 6  | 0.09  | -0.12 | 0.22  | 0.32 | 0.33 |
| cg10141715 | SLC5A8   | 12 | 0.06  | -0.09 | 0.15  | 0.32 | 0.33 |
| cg24292612 | DEFB1    | 8  | -0.09 | 0.07  | -0.16 | 0.32 | 0.34 |
| cg25538571 | FLJ46365 | 8  | 0.03  | 0.15  | -0.12 | 0.33 | 0.34 |
| cg05436231 | CD164L2  | 1  | 0.14  | -0.03 | 0.16  | 0.33 | 0.34 |
| cg16463460 | WT1      | 11 | 0.06  | -0.11 | 0.16  | 0.33 | 0.34 |
| cg16853982 | ACTN2    | 1  | -0.11 | 0.04  | -0.15 | 0.35 | 0.36 |
| cg25345738 | PWP1     | 12 | -0.07 | 0.09  | -0.15 | 0.35 | 0.36 |
| cg14973995 | MFSD10   | 4  | 0.04  | 0.16  | -0.11 | 0.36 | 0.36 |
| cg13164537 | CD226    | 18 | 0.16  | 0.04  | 0.11  | 0.36 | 0.37 |
| cg07260592 | LPA      | 6  | 0.07  | -0.09 | 0.16  | 0.38 | 0.39 |
| cg01939428 | UBE3C    | 7  | -0.08 | 0.08  | -0.16 | 0.41 | 0.41 |
| cg07408740 | OGDH     | 7  | -0.07 | 0.08  | -0.15 | 0.43 | 0.43 |
| cg25802093 | SPAG6    | 10 | -0.10 | 0.09  | -0.19 | 0.43 | 0.43 |
| cg14603345 | BTBD3    | 20 | 0.12  | -0.05 | 0.17  | 0.43 | 0.44 |

|            |               |    |       |       |      |      |      |
|------------|---------------|----|-------|-------|------|------|------|
| cg13315147 | <i>CYP2E1</i> | 10 | -0.09 | -0.16 | 0.06 | 0.48 | 0.48 |
|------------|---------------|----|-------|-------|------|------|------|

**Table S3. Brain sample characteristics.**

| BRAIN   | SOURCE | DX      | SEX | AGE | PMI | REGIONS          | NUCLEOTIDE      | AMINO ACID |
|---------|--------|---------|-----|-----|-----|------------------|-----------------|------------|
| AN01570 | NICHD  | AUT+SEZ | F   | 18  | 7   | CCTX, TCTX       |                 |            |
| AN12457 | NICHD  | AUT+SEZ | F   | 29  | 18  | CCTX, TCTX       |                 |            |
| 1638    | NICHD  | AUT+SEZ | F   | 20  | 50  | CCTX, TCTX       |                 |            |
| 5278    | NICHD  | AUT+SEZ | F   | 15  | 13  | CCTX, TCTX       |                 |            |
| 5419    | NICHD  | AUT+SEZ | F   | 19  |     | CCTX, TCTX       |                 |            |
| 1038    | NICHD  | CTL     | F   | 24  | 7   | STRM, CCTX, TCTX |                 |            |
| 1101    | NICHD  | CTL     | F   | 19  | 7   | CCTX, TCTX       |                 |            |
| 1614    | NICHD  | CTL     | F   | 27  | 18  | STRM, CCTX, TCTX |                 |            |
| 1846    | NICHD  | CTL     | F   | 20  | 9   | CCTX, TCTX       |                 |            |
| 4676    | NICHD  | CTL     | F   | 40  | 15  | STRM, CCTX, TCTX |                 |            |
| 4724    | NICHD  | CTL     | F   | 16  | 15  | STRM, CCTX, TCTX |                 |            |
| 4725    | NICHD  | CTL     | F   | 32  | 17  | STRM, CCTX, TCTX |                 |            |
| 5401    | NICHD  | CTL     | F   | 18  | 22  | CCTX, TCTX       |                 |            |
| 6355    | HBTRC  | RTT     | F   | 16  | 28  | STRM, CCTX, TCTX | NI              |            |
| 7761    | HBTRC  | RTT     | F   | 41  | 49  | STRM, CCTX, TCTX | 397C>T          | R133C      |
| 7773    | HBTRC  | RTT     | F   | 24  | 25  | STRM, CCTX, TCTX | 473C>T          | T158M      |
| 7783    | HBTRC  | RTT     | F   | 26  | 39  | STRM, CCTX, TCTX | Exonic deletion |            |
| B7992   | HBTRC  | RTT     | F   | 31  | 30  | STRM, CCTX, TCTX | NI              |            |

HBTRC, Harvard Brain Tissue Resource Center; NICHD, NICHD Brain and Tissue Bank at the University of Maryland School of Medicine; PMI, post mortem interval (in hours); CCTX, cingulate cortex; STRM, striatum; TCTX, temporal cortex; NI, no mutation identified in *MECP2* coding sequence

**Table S4. Reported CNVs >0.5 kb.**

| Sample   | Chr | Start (hg18) | Stop (hg18) | Size (bp) | CNV  | Reference |
|----------|-----|--------------|-------------|-----------|------|-----------|
| 04C35560 | 9   | 33,669,300   | 33,845,500  | 176,200   | gain | Marshall  |
| 04C35560 | 14  | 19,204,300   | 19,492,400  | 288,100   | gain | Marshall  |
| 04C35560 | 15  | 18,403,700   | 20,089,400  | 1,685,700 | gain | Marshall  |
| 04C36352 | 2   | 242,634,423  | 242,730,382 | 95,960    | loss | Marshall  |
| 04C36352 | 3   | 60,048,193   | 60,263,468  | 215,276   | loss | Marshall  |
| 04C36352 | 7   | 13,565,690   | 13,684,241  | 118,552   | loss | Marshall  |
| 04C36352 | 14  | 19,272,965   | 19,492,423  | 219,459   | loss | Marshall  |
| 04C36352 | 15  | 18,427,103   | 20,089,383  | 1,662,281 | gain | Marshall  |
| 04C36352 | 17  | 41,518,102   | 41,719,833  | 201,732   | gain | Marshall  |
| 03C15793 | 2   | 89,743,464   | 89,877,778  | 134,314   | gain | Bucan     |
| 03C15793 | 5   | 45,794,921   | 45,866,265  | 71,344    | gain | Bucan     |
| 03C15793 | 6   | 19,078,655   | 19,138,709  | 60,054    | loss | Bucan     |

|          |    |             |             |         |      |       |
|----------|----|-------------|-------------|---------|------|-------|
| 03C15793 | 6  | 79,029,919  | 79,088,461  | 58,542  | loss | Bucan |
| 03C15943 | 2  | 242,565,978 | 242,645,262 | 79,284  | loss | Bucan |
| 03C15943 | 3  | 75,511,364  | 75,613,585  | 102,221 | loss | Bucan |
| 03C15943 | 12 | 31,157,553  | 31,298,174  | 140,621 | gain | Bucan |
| 03C15943 | 15 | 32,505,885  | 32,587,887  | 82,002  | loss | Bucan |
| 03C15943 | 17 | 41,525,625  | 41,705,867  | 180,242 | gain | Bucan |
| 03C15943 | 19 | 47,975,959  | 48,387,680  | 411,721 | loss | Bucan |
| 03C16444 | 2  | 41,065,513  | 41,129,076  | 63,563  | loss | Bucan |
| 03C16444 | 6  | 79,029,919  | 79,088,461  | 58,542  | loss | Bucan |
| 03C16444 | 11 | 55,127,596  | 55,198,944  | 71,348  | loss | Bucan |
| 03C16444 | 11 | 67,258,201  | 67,505,393  | 247,192 | loss | Bucan |
| 03C16444 | 19 | 24,187,993  | 24,282,139  | 94,146  | loss | Bucan |
| 03C16444 | 19 | 48,337,396  | 48,387,680  | 50,284  | loss | Bucan |
| 03C16562 | 6  | 79,029,919  | 79,088,461  | 58,542  | loss | Bucan |
| 03C16562 | 7  | 110,744,529 | 110,980,473 | 235,944 | loss | Bucan |
| 03C16562 | 10 | 44,530,695  | 44,679,489  | 148,794 | gain | Bucan |
| 03C16562 | 11 | 55,127,596  | 55,198,944  | 71,348  | loss | Bucan |
| 03C16562 | 21 | 22,334,019  | 22,529,970  | 195,951 | loss | Bucan |
| 03C17196 | 5  | 97,053,241  | 97,121,798  | 68,557  | loss | Bucan |
| 03C17196 | 6  | 79,029,919  | 79,088,461  | 58,542  | loss | Bucan |
| 03C17196 | 11 | 55,127,596  | 55,198,944  | 71,348  | loss | Bucan |
| 04C24298 | 1  | 147,305,743 | 147,427,061 | 121,318 | loss | Bucan |
| 04C24298 | 11 | 55,127,596  | 55,198,944  | 71,348  | loss | Bucan |
| 04C24298 | 16 | 34,393,083  | 34,624,019  | 230,936 | gain | Bucan |
| 04C24298 | 19 | 20,422,199  | 20,473,895  | 51,696  | loss | Bucan |
| 04C24298 | 21 | 13,609,441  | 14,121,682  | 512,241 | gain | Bucan |
| 05C47170 | 6  | 79,029,919  | 79,088,461  | 58,542  | loss | Bucan |
| 05C47170 | 8  | 145,064,090 | 145,247,517 | 183,427 | gain | Bucan |
| 05C47170 | 11 | 55,127,596  | 55,204,003  | 76,407  | loss | Bucan |
| 05C47170 | 14 | 104,225,149 | 104,279,612 | 54,463  | gain | Bucan |
| 05C47170 | 15 | 32,505,885  | 32,587,887  | 82,002  | loss | Bucan |
| 05C47170 | 16 | 67,558,088  | 67,660,490  | 102,402 | gain | Bucan |
| 05C47170 | 16 | 1,366,587   | 1,439,378   | 72,791  | gain | Bucan |
| 07C64541 | 2  | 110,214,531 | 110,339,819 | 125,288 | loss | Bucan |
| 07C64541 | 4  | 82,660,183  | 82,725,186  | 65,003  | gain | Bucan |
| 07C64541 | 6  | 79,029,919  | 79,088,461  | 58,542  | loss | Bucan |
| 07C64541 | X  | 143,125,478 | 143,221,467 | 95,989  | loss | Bucan |
| 07C64541 | 11 | 55,127,596  | 55,204,003  | 76,407  | loss | Bucan |
| 07C64541 | 12 | 31,892,781  | 31,954,269  | 61,488  | gain | Bucan |
| 07C64541 | 19 | 20,422,199  | 20,473,895  | 51,696  | loss | Bucan |
| 07C64541 | 22 | 17,257,786  | 17,376,565  | 118,779 | gain | Bucan |
| 07C64722 | 1  | 147,305,743 | 147,427,061 | 121,318 | loss | Bucan |
| 07C64722 | 2  | 241,272,566 | 241,332,581 | 60,015  | gain | Bucan |
| 07C64722 | 6  | 79,029,919  | 79,088,461  | 58,542  | loss | Bucan |
| 07C64722 | 11 | 55,127,596  | 55,204,003  | 76,407  | loss | Bucan |
| 07C64722 | 12 | 7,888,156   | 7,990,569   | 102,413 | gain | Bucan |
| 07C64722 | 16 | 1,968,402   | 2,028,586   | 60,184  | gain | Bucan |

**Table S5. Primer sequences.**

| ASSAY   | GENE        | FORWARD 5' – 3'                    | REVERSE 5' – 3'                                            |
|---------|-------------|------------------------------------|------------------------------------------------------------|
| SEQ     | <i>TAC1</i> | aggaagagagGATAGTGGGGAGATTGGTTTTTTA | cagtaatacgactcactatagggagaaggctCCAATAATTCAAATCATCATTAACTCC |
| qRT-PCR | <i>ACTB</i> | GTTGTCGACGACGAGCG                  | GCACAGAGCCTCGCCTT                                          |
| qRT-PCR | <i>TAC1</i> | TGCACTCCTTTCATAAGCCA               | AACGGGATGCTGATTCCTC                                        |
| ChIP    | <i>TAC1</i> | GGAGGAACCAGAGAAACTCAGC             | GACCAGTAATTCAGATCATCATTGG                                  |

## References

1. Bucan M, Abrahams BS, Wang K, Glessner JT, Herman EI, Sonnenblick LI, et al. (2009): Genome-wide analyses of exonic copy number variants in a family-based study point to novel autism susceptibility genes. *PLoS Genet.* 5:e1000536.
2. Marshall CR, Noor A, Vincent JB, Lionel AC, Feuk L, Skaug J, et al. (2008): Structural variation of chromosomes in autism spectrum disorder. *Am J Hum Genet.* 82:477-488.
